# Supplementary material
Source: publisher figshare collection journal article supplement (https://brill.figshare.com/articles/dataset/_/21387831)
Supplement: Supplementary file 1 [file 1]

## Short Note

The diurnal advertisement and response call of *Pulchrana glandulosa* (Anura: Ranidae) (Boulenger, 1882), from Langkawi Island, Kedah, Peninsular Malaysia

Dasi Ong, Shahriza Shahrudin\*

Department of Physiology, School of Pharmaceutical Sciences, Universiti Sains  
Malaysia (USM), 11800 Gelugor, Penang, Malaysia

\*Corresponding author: shahriza20@yahoo.com

### Supplementary material

**Audio S1.** Day call by *P. glandulosa*.
